# Supplementary material for: The relationships between golf and health: a scoping review
Source: PubMed Central journal article supplement (PMC5256129; doi:10.1136/bjsports-2016-096625), 2016-10-03
Supplement: bjsports-2016-096625supp_appendix2.pdf [file bjsports-2016-096625supp_appendix2.pdf]

|                                                                                                                                            |
|--------------------------------------------------------------------------------------------------------------------------------------------|
| <p style="text-align: center;"><b>Appendix 2. Searching protocol – electronic databases</b><br/><b>Scoping Review- Golf and Health</b></p> |
|--------------------------------------------------------------------------------------------------------------------------------------------|

### **Step 1**

#### **SPORT Discus**

1st search: from 1900, all articles, all languages

Search for: Golf AND health

Hits: 1364

2nd search

Search for: Golf AND health AND review

Hits: 56, of which 11 relevant studies identified

#### **Google Advanced**

1st search: Golf AND health AND review

Hits: 487,000

First 200 articles reviewed for relevance, 15 appeared relevant

#### **ProQuest dissertations**

1st search : Golf AND health

Hits: 4, of which 2 relevant covering narrow aspect of topic.

Reference section of useful studies reviewed.

### **Step 2**

The main category – terms are:

1. Golf  
Plus/minus
2. Health OR illness OR injur\* OR fitness OR mortality OR morbidity

#### **SPORTDiscus**

1st search: from 1900, all articles, all languages

Search for: Golf AND health OR illness OR injur\* OR fitness OR mortality OR morbidity

Hits: 3781

2<sup>nd</sup> search: from 1900, all articles excluding magazine, all languages

Search for: Golf AND health OR illness OR injur\* OR fitness OR mortality OR morbidity  
excluding magazines

Hits: 744

#### **Web of Science**

1 st search: from 1900, all articles, all languages,

Search for: Golf AND health OR illness OR injur\* OR fitness OR mortality OR morbidity

Hits: 559

## **PsycINFO**

1st search from 1900, all articles, all languages

Search for: Golf

Topics

Hits: 832

## **Medline**

1<sup>st</sup> search : from 1900, all articles, all languages

Search for: Golf

Hits: 1721

## **Google scholar**

1st search: from 1900, articles and patents, include citations

Search for: Golf AND health OR illness OR injury OR fitness OR mortality OR morbidity

Hits: 154000, >too many

2<sup>nd</sup> Search: from 1900, articles and patents, include citations

Search for: Golf AND health OR illness OR injury OR fitness OR mortality OR morbidity

Within title

Hits: 185

## **Initial database search**

Hits: 4041 before duplicates

3167 once duplicates removed

## **Grey Literature**

### **Google (advanced search)**

British Journal of Sports Medicine Domain

1<sup>st</sup> search: from 1900, all articles, all languages

Search for: Golf AND health OR illness OR injury OR fitness OR mortality OR morbidity

AND specify URL <http://bjsm.bmj.com/>

Hits: 548

[https://www.google.co.uk/search?as\\_q=golf&as\\_epq=&as\\_oq=health+illness+injury++fitness++mortality+morbidity+&as\\_eq=&as\\_nlo=&as\\_nhi=&lr=&cr=&as\\_qdr=all&as\\_sitesearch=http://bjsm.bmj.com/&as\\_occt=any&safe=images&as\\_filetype=&as\\_rights](https://www.google.co.uk/search?as_q=golf&as_epq=&as_oq=health+illness+injury++fitness++mortality+morbidity+&as_eq=&as_nlo=&as_nhi=&lr=&cr=&as_qdr=all&as_sitesearch=http://bjsm.bmj.com/&as_occt=any&safe=images&as_filetype=&as_rights)

=&gws\_rd=cr&ei=Eq1AVue-  
OsfTU6XPtOAC#q=golf+health+OR+illness+OR+injury+OR+fitness+OR+mortality+O  
R+morbidity+site:http://bjsm.bmj.com/&as\_qdr=all&start=20

#### World Golf Foundation

1<sup>st</sup> search: from 1900, all articles, all languages

Search for: Golf AND health OR illness OR injury OR fitness OR mortality OR morbidity  
AND specify URL <http://www.worldgolffoundation.org/>

Hits:11

[https://www.google.com/search?as\\_q=golf&as\\_epq=&as\\_oq=health+illness+injury+fitness+mortality+morbidity+&as\\_eq=&as\\_nlo=&as\\_nhi=&lr=&cr=&as\\_qdr=all&as\\_sitesearch=http%3A%2F%2Fwww.worldgolffoundation.org%2F&as\\_occt=any&safe=images&as\\_filetype=&as\\_rights=](https://www.google.com/search?as_q=golf&as_epq=&as_oq=health+illness+injury+fitness+mortality+morbidity+&as_eq=&as_nlo=&as_nhi=&lr=&cr=&as_qdr=all&as_sitesearch=http%3A%2F%2Fwww.worldgolffoundation.org%2F&as_occt=any&safe=images&as_filetype=&as_rights=)

#### Royal and Ancient

1<sup>st</sup> search: from 1900, all articles, all languages

Search for: Golf AND health OR illness OR injury OR fitness OR mortality OR morbidity  
AND specify URL <http://www.randa.org/>

Hits: 133

[https://www.google.com/search?as\\_q=golf&as\\_epq=&as\\_oq=health+illness+injury+fitness+mortality+morbidity+&as\\_eq=&as\\_nlo=&as\\_nhi=&lr=&cr=&as\\_qdr=all&as\\_sitesearch=http%3A%2F%2Fwww.randa.org%2F&as\\_occt=any&safe=images&as\\_filetype=&as\\_rights=](https://www.google.com/search?as_q=golf&as_epq=&as_oq=health+illness+injury+fitness+mortality+morbidity+&as_eq=&as_nlo=&as_nhi=&lr=&cr=&as_qdr=all&as_sitesearch=http%3A%2F%2Fwww.randa.org%2F&as_occt=any&safe=images&as_filetype=&as_rights=)

#### Faculty of Sports and Exercise Medicine

1<sup>st</sup> search: from 1900, all articles, all languages

Search for: Golf AND health OR illness OR injury OR fitness OR mortality OR morbidity  
AND specify URL <http://www.fsem.ac.uk/>

Hits: 8

[https://www.google.com/search?as\\_q=golf&as\\_epq=&as\\_oq=health+injury+illness+morbidity+mortality&as\\_eq=&as\\_nlo=&as\\_nhi=&lr=&cr=&as\\_qdr=all&as\\_sitesearch=http%3A%2F%2Fwww.fsem.ac.uk%2F&as\\_occt=any&safe=images&as\\_filetype=&as\\_rights=](https://www.google.com/search?as_q=golf&as_epq=&as_oq=health+injury+illness+morbidity+mortality&as_eq=&as_nlo=&as_nhi=&lr=&cr=&as_qdr=all&as_sitesearch=http%3A%2F%2Fwww.fsem.ac.uk%2F&as_occt=any&safe=images&as_filetype=&as_rights=)

#### American College for Sports Medicine

1<sup>st</sup> search: from 1900, all articles, all languages

Search for: Golf AND health OR illness OR injury OR fitness OR mortality OR morbidity  
AND specify URL <http://www.acsm.org/>

Hits 26

[https://www.google.com/search?as\\_q=golf&as\\_epq=&as\\_oq=health+injury+illness+morbidity+mortality&as\\_eq=&as\\_nlo=&as\\_nhi=&lr=&cr=&as\\_qdr=all&as\\_sitesearch=http%3A%2F%2Fwww.acsm.org%2F&as\\_occt=any&safe=images&as\\_filetype=&as\\_rights=](https://www.google.com/search?as_q=golf&as_epq=&as_oq=health+injury+illness+morbidity+mortality&as_eq=&as_nlo=&as_nhi=&lr=&cr=&as_qdr=all&as_sitesearch=http%3A%2F%2Fwww.acsm.org%2F&as_occt=any&safe=images&as_filetype=&as_rights=)

### **ProQuest dissertations**

1<sup>st</sup> search: from 1900, all articles, all languages

Search for: Golf AND health OR illness OR injury OR fitness OR mortality OR morbidity

Hits: 42740 >too many

2nd search : Golf AND Health OR illness OR injur\* OR fitness OR mortality OR morbidity  
in title or abstract

Hits: 175 Duplicates 115

**World Health Organisation- International Clinical Trials Registry Platform**

1st search

Search for: Golf

Hits: 2

<http://apps.who.int/trialsearch/Trial2.aspx?TrialID=NCT02544399> (relevant)

<http://apps.who.int/trialsearch/Trial2.aspx?TrialID=EUCTR2005-003458-81-IT> (not relevant)

**Initial Grey Literature Databases search**

**Hits: 903**
