# Supplementary material for: The relationships between golf and health: a scoping review
Source: PubMed Central journal article supplement (PMC5256129; doi:10.1136/bjsports-2016-096625), 2016-10-03
Supplement: bjsports-2016-096625supp_appendix3.pdf [file bjsports-2016-096625supp_appendix3.pdf]

|                                                                                                        |  |
|--------------------------------------------------------------------------------------------------------|--|
| <b><u>1. BIBLIOGRAPHIC INFORMATION</u></b>                                                             |  |
| Study ID                                                                                               |  |
| Article title                                                                                          |  |
| Extracted by                                                                                           |  |
| Type of publication (journal article, book chapter, grey literature)                                   |  |
| Country                                                                                                |  |
| <b><u>2. RESEARCHER DETAILS</u></b>                                                                    |  |
| Authors and affiliations (list as presented on paper)                                                  |  |
| <b><u>3. AIMS &amp; METHODS</u></b>                                                                    |  |
| Study aims                                                                                             |  |
| Methodology                                                                                            |  |
| Methods                                                                                                |  |
| <b><u>4. SCOPING REVIEW PCC</u></b>                                                                    |  |
| Population                                                                                             |  |
| Concept                                                                                                |  |
| Context                                                                                                |  |
| <b><u>5. A PRIORI THEMES (does the paper report any data relevant to the following issues?)</u></b>    |  |
| <b>(a) Golf participation</b>                                                                          |  |
| <b>(b) Physical Activity &amp; Health</b>                                                              |  |
| <b>(c) Golf and physical activity</b>                                                                  |  |
| <b>(d) Longevity</b>                                                                                   |  |
| <b>(e) Cardio-respiratory</b>                                                                          |  |
| <b>(f) Metabolic</b>                                                                                   |  |
| <b>(g) MSK</b>                                                                                         |  |
| <b>(h) Accident</b>                                                                                    |  |
| <b>(i) Illness</b>                                                                                     |  |
| <b>(j) Wellness</b>                                                                                    |  |
| <b>(k) Mental illness</b>                                                                              |  |
| <b>(l) Special populations</b>                                                                         |  |
| <b><u>6. EMERGENT THEMES (does the paper report on any further issues not related to the above</u></b> |  |

|                                                   |  |
|---------------------------------------------------|--|
| <b>that might be of interest to this review?)</b> |  |
| <b>(a)</b>                                        |  |
| <b>(b)</b>                                        |  |
| <b>(c)</b>                                        |  |
| <b>(d)</b>                                        |  |
